# Supplementary material
Source: PubMed Central journal article supplement (PMC2990951)

## Supplementary Figure 2: Confirmation of NF- $\kappa$ B pathway inhibition

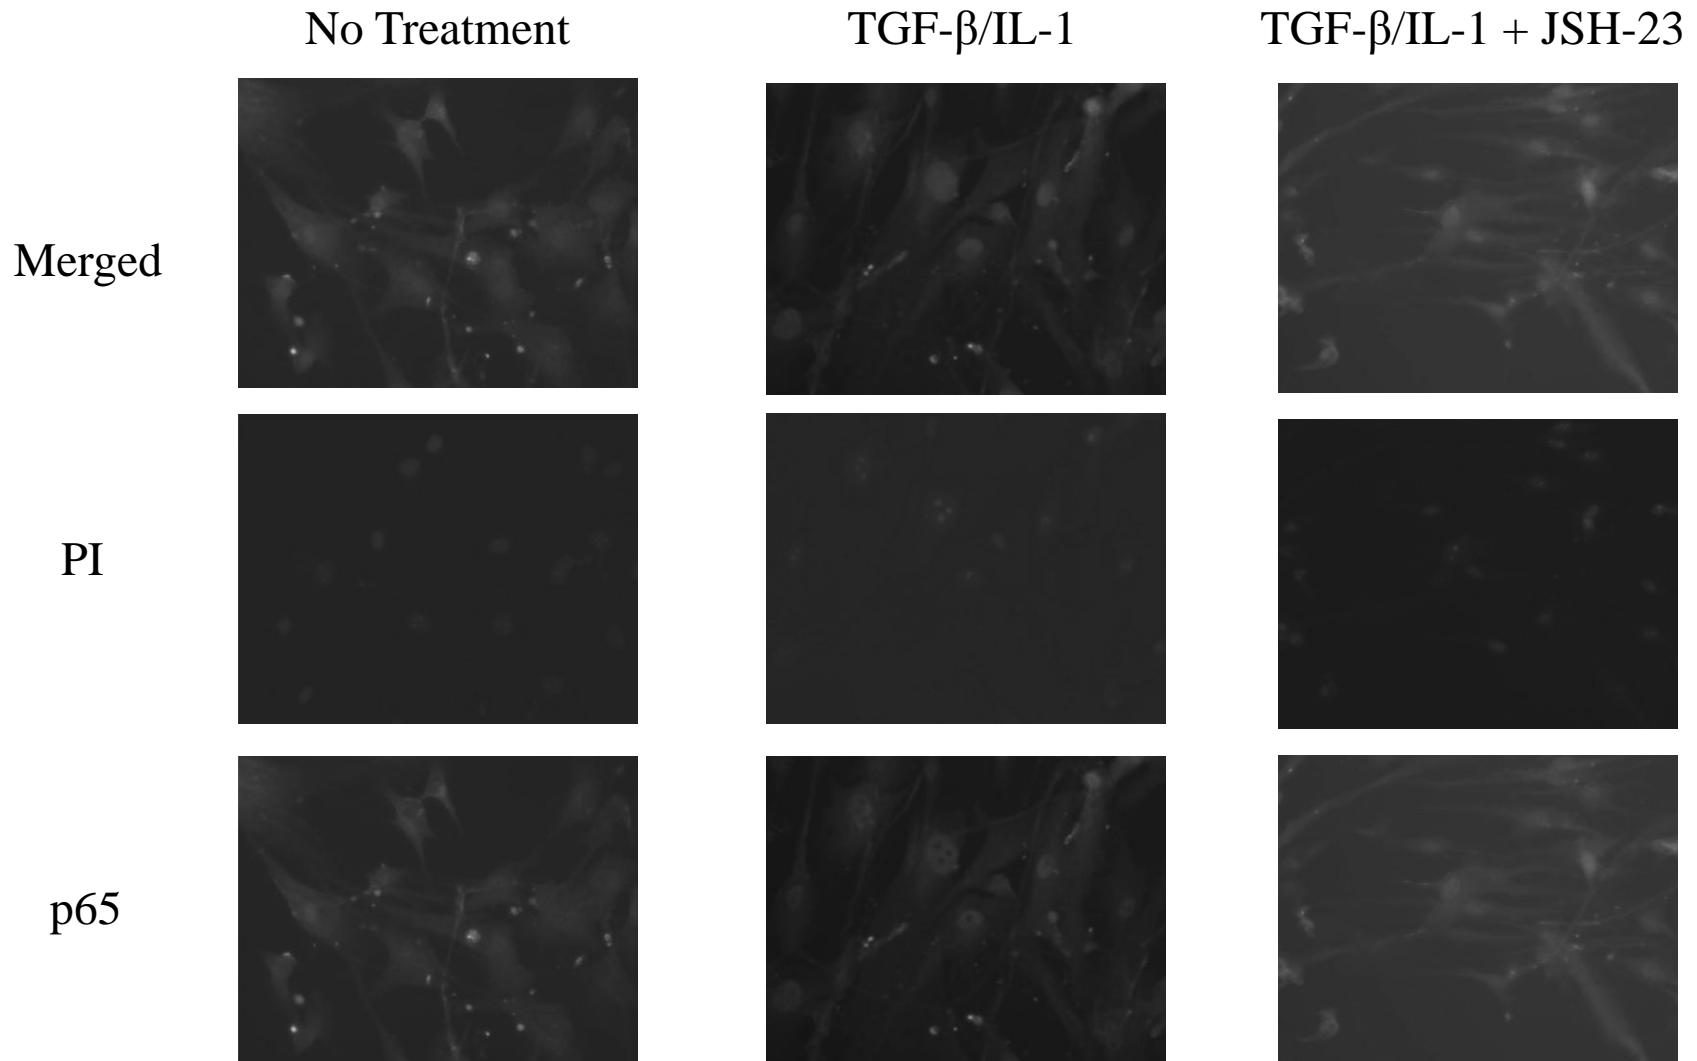

## Supplementary Figure 1: Confirmation of ERK, Smad, JNK, and p38 pathway inhibition

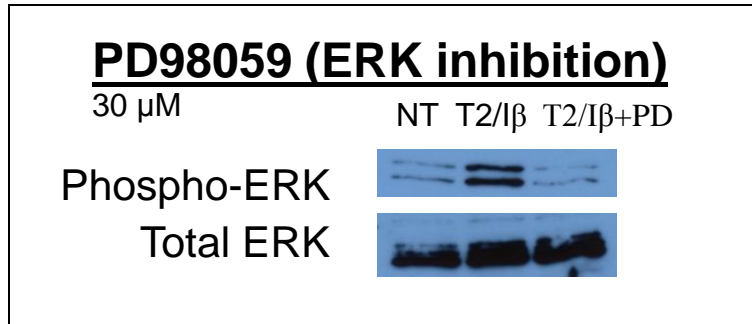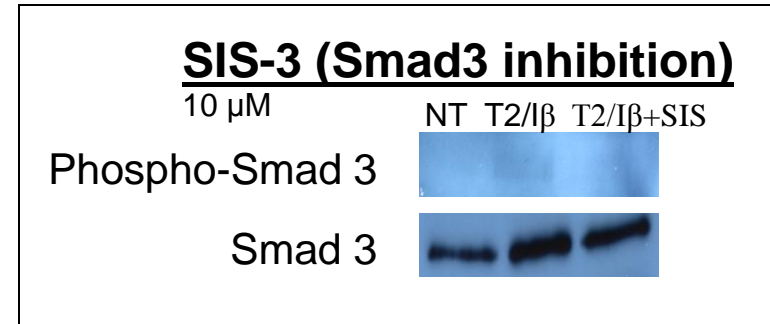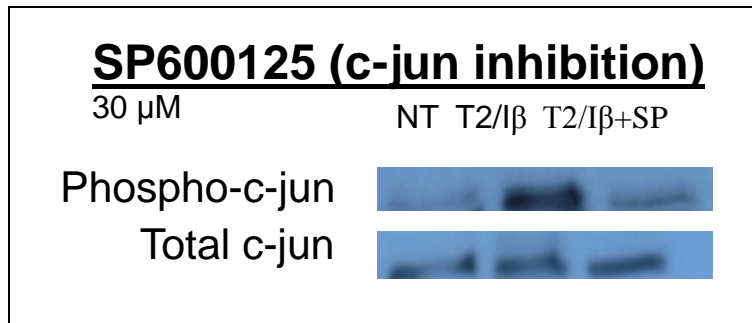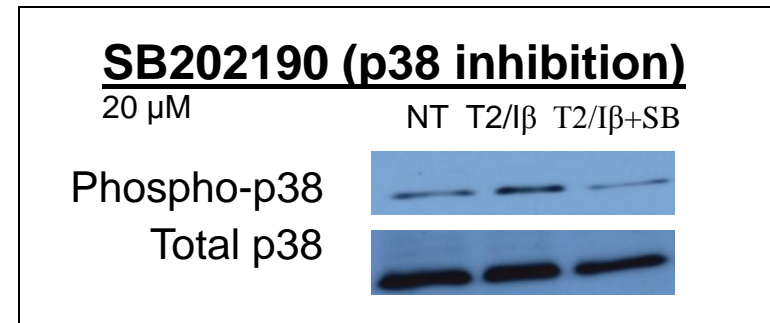

Supplement: NIHMS224994-supplement-figures.pdf [file NIHMS224994-supplement-figures.pdf]
